# Supplementary material for: Dynamic transcriptomes of resistant and susceptible peach lines after infestation by green peach aphids (Myzus persicae Sülzer) reveal defence responses controlled by the Rm3 locus
Source: BMC Genomics. 2018 Nov 28;19:846. doi: 10.1186/s12864-018-5215-7 (PMC6264056; doi:10.1186/s12864-018-5215-7)
Supplement: Supplementary file 7 — Primers used for quantitative qPCR analysis. (XLSX 10 kb) [file 12864_2018_5215_MOESM7_ESM.xlsx]

## Sheet: Sheet1
Additional file 7. Primers used for quantitative qPCR analysis.
Gene ID	Gene full name	Gene short name	Amplicon size	Sequence (5’ – 3’) forward	Sequence (3’-5') reverse
Prupe.1G053800	Beta-amylase 1	PpBAM1	101 bp	TGAGGGAAATACCGAAGGC	CGAATGCCACAAAATGCCT
Prupe.1G296600	Cytochrome P450 superfamily protein CYP734A1, CYP72B1	PpBAS1	96 bp	ATGCTGTGCCTATGAATGTTGC	GACTCAGCAAAATCGCATCG
Prupe.2G043900	Monooxygenase 1	PpMO1	122 bp	AGATGCGAGTTCTGAGACTGTC	ATGTGAGTCACTGAAAAGGACG
Prupe.2G176900	ACC synthase 1	PpACS1	172 bp	CATTTGTACGCCAAGGGAAG	ACGAGAGGAGAGTGAGGAGACA
Prupe.2G248900	Light harvesting complex photosystem II	PpLHCB4.3	133 bp	GAATGTGGCGGGTGATGTG	GCTCGCACTCTCGGAACCT
Prupe.2G251200	Fatty acid desaturase 8	PpFAD8	230 bp	GTATCGTGGAAAGGAATGGAGT	CCAATAAGTGAAGTGGGAGAGG
Prupe.2G305200	Chitinase A	PpCHIA	124 bp	ACAACAATGCTGCCAACCTT	TCAGCAGGAATAAATCCACCAC
Prupe.3G266000	Calcium-binding EF-hand family protein	PpEF-hand protein	156 bp	CCAAACTACCTTCCCACCCTGTTAG	AGTTACATTTGAGGGCGTTC
Prupe.4G200000	Terpene synthase 21	PpTPS21	128 bp	ACAGGAAGCAATATGAGGTGTCA	AAGGATAGGCATTGGCACAGAG
Prupe.5G148700	WRKY DNA-binding protein 75	PpWRKY75	240 bp	GCATTTCAAACAAGGAGCCA	CTGGTCAAAGTTTTCTGCGG
Prupe.6G091700	Mitogen-activated protein kinase 3	PpMAPK3	126 bp	TCGTCAACACCACAACACAAAC	CCACTGCTGGGAGGGACG
Prupe.6G207900	Elicitor-activated gene 3-1	PpELI3	127 bp	AAACTCACTACAACCCTGGCACT	GGGTGTTCTTGTTCTGGAGAGAC
Prupe.8G142700	Photosystem I light harvesting complex gene 1	PpLHCA1	155 bp	TTGTAGAGCACCAACGCAGC	AAAAGCCAACAATGCGAGC
Prupe.I001000	Uridine diphosphate glycosyltransferase 74E2	PpUGT74E2	218 bp	GCTCACAGCCCTTGCCTATG	CTCCATCTCATCCCTATCCCAC
Prupe.6G163400	Actin/actin-like conserved site-containing protein	PpActin	58 bp	GATTCCGGTGCCCAGAAGT	CCAGCAGCTTCCATTCCAA
All primers were designed based on the Prunus persica v1.0 assembly genome sequence at the Genome Database for Rosaceae (GDR, http://www.rosaceae.org/).
